# Supplementary material
Source: PubMed Central journal article supplement (PMC4989259)
Supplement: aasm.39.9.1701s1.pdf [file aasm.39.9.1701s1.pdf]

| <b>Table S1</b> —Adiposity measures by continuous sleep duration, efficiency, and variability per 1 SD: the Multi-Ethnic Study of Atherosclerosis 2010-2013 |                     |                    |                     |                    |                            |                    |
|-------------------------------------------------------------------------------------------------------------------------------------------------------------|---------------------|--------------------|---------------------|--------------------|----------------------------|--------------------|
|                                                                                                                                                             | Sleep Duration      |                    | Sleep Efficiency    |                    | Sleep Duration Variability |                    |
|                                                                                                                                                             | Continuous per 1 SD | P for linear trend | Continuous per 1 SD | P for linear trend | Continuous per 1 SD        | P for linear trend |
| <b>BMI (kg/m<sup>2</sup>)</b>                                                                                                                               |                     |                    |                     |                    |                            |                    |
| Model 1                                                                                                                                                     | -0.58               | <0.001             | -0.45               | <0.001             | 0.29                       | 0.012              |
| Model 2                                                                                                                                                     | -0.56               | <0.001             | -0.43               | <0.001             | 0.34                       | 0.005              |
| Model 3                                                                                                                                                     | n/a                 |                    | -0.33               | 0.008              | 0.23                       | 0.062              |
| <b>Waist circumference (cm)</b>                                                                                                                             |                     |                    |                     |                    |                            |                    |
| Model 1                                                                                                                                                     | -1.30               | <0.001             | -1.27               | <0.001             | 0.84                       | 0.005              |
| Model 2                                                                                                                                                     | -1.17               | <0.001             | -1.21               | <0.001             | 0.94                       | 0.003              |
| Model 3                                                                                                                                                     | n/a                 |                    | -1.00               | 0.002              | 0.73                       | 0.025              |
| <b>Total body fat (kg)</b>                                                                                                                                  |                     |                    |                     |                    |                            |                    |
| Model 1                                                                                                                                                     | -0.88               | <0.001             | -0.90               | <0.001             | 0.64                       | 0.004              |
| Model 2                                                                                                                                                     | -0.81               | 0.001              | -0.82               | <0.001             | 0.73                       | 0.002              |
| Model 3                                                                                                                                                     | n/a                 |                    | -0.68               | 0.004              | 0.58                       | 0.014              |

Sleep duration variability is defined as the within-person standard deviation of sleep duration and is measured in minutes

Model 1 adjusted for age, sex, race, and field center

Model 2 adjusted for model 1, plus depressive symptoms, anti-depressants, alcohol use, sleep medication, smoking, income, marital status, and education

Model 3 adjusted for model 2, plus sleep duration

**Table S2**—Adjusted means of adiposity measures by categories of sleep duration, efficiency and variability restricted to those without sleep apnea (AHI<15): the Multi-Ethnic Study of Atherosclerosis 2011-2013

| <b>Sleep Duration</b>             | <5 hours       | 5-6 hours | 6-7 hours  | 7-8 hours      | >8 hours       | P for trend |
|-----------------------------------|----------------|-----------|------------|----------------|----------------|-------------|
| <i>N</i>                          | 135            | 241       | 427        | 354 (Referent) | 143            |             |
| <b>BMI</b>                        |                |           |            |                |                |             |
| Model 1                           | 28.4*          | 28.3 **   | 27.7       | 27.2           | 27.7           | 0.009       |
| Model 2                           | 28.3*          | 28.4**    | 27.8       | 27.2           | 27.8           | 0.028       |
| <b>Waist Circumference</b>        |                |           |            |                |                |             |
| Model 1                           | 98.2*          | 98.2*     | 96.9       | 95.4           | 97.2           | 0.058       |
| Model 2                           | 97.6           | 98.2*     | 97.1       | 95.5           | 97.8           | 0.214       |
| <b>Total Body Fat</b>             |                |           |            |                |                |             |
| Model 1                           | 24.5           | 24.7*     | 23.8       | 22.9           | 23.6           | 0.049       |
| Model 2                           | 24.3           | 24.8*     | 23.9       | 23.0           | 23.9           | 0.128       |
| <b>Sleep Efficiency</b>           |                |           |            |                |                |             |
| <i>N</i>                          | <85%           | 85-87.9%  | 87.9-90.4% | 90.4%-92.4%    | >92.4%         |             |
| <i>N</i>                          | 105            | 175       | 321        | 341            | 358 (Referent) |             |
| <b>BMI</b>                        |                |           |            |                |                |             |
| Model 1                           | 27.5           | 29.0***   | 27.9       | 27.6           | 27.3           | 0.010       |
| Model 2                           | 27.4           | 29.1***   | 28.0       | 27.5           | 27.4           | 0.018       |
| Model 3                           | 27.2           | 29.1***   | 28.0       | 27.6           | 27.4           | 0.043       |
| <b>Waist Circumference</b>        |                |           |            |                |                |             |
| Model 1                           | 96.8           | 100.1***  | 97.3       | 96.6           | 95.3           | 0.003       |
| Model 2                           | 96.1           | 100.3***  | 97.5       | 96.6           | 95.5           | 0.015       |
| Model 3                           | 95.9           | 100.3***  | 97.5       | 96.6           | 95.6           | 0.021       |
| <b>Total Body Fat</b>             |                |           |            |                |                |             |
| Model 1                           | 23.8           | 25.9***   | 24.0       | 23.5           | 22.8           | 0.005       |
| Model 2                           | 23.4           | 26.1***   | 24.2       | 23.4           | 23.0           | 0.014       |
| Model 3                           | 23.2           | 26.1**    | 24.2       | 23.4           | 23.0           | 0.026       |
| <b>Sleep Duration Variability</b> |                |           |            |                |                |             |
| <i>N</i>                          | <=48           | 48-70     | 70-99      | 99-262         |                |             |
| <i>N</i>                          | 335 (Referent) | 348       | 301        | 316            |                |             |
| <b>BMI</b>                        |                |           |            |                |                |             |
| Model 1                           | 27.5           | 27.8      | 27.8       | 28.0           |                | 0.245       |
| Model 2                           | 27.6           | 27.8      | 27.8       | 28.1           |                | 0.272       |
| Model 3                           | 27.7           | 27.9      | 27.7       | 27.9           |                | 0.670       |
| <b>Waist Circumference</b>        |                |           |            |                |                |             |
| Model 1                           | 95.8           | 97.1      | 97.2       | 97.6           |                | 0.090       |
| Model 2                           | 96.0           | 97.1      | 97.0       | 97.9           |                | 0.110       |
| Model 3                           | 96.2           | 97.2      | 97.0       | 97.7           |                | 0.239       |
| <b>Total Body Fat</b>             |                |           |            |                |                |             |
| Model 1                           | 23.2           | 23.7      | 23.9       | 24.3           |                | 0.124       |
| Model 2                           | 23.3           | 23.8      | 23.8       | 24.5           |                | 0.139       |
| Model 3                           | 23.5           | 23.9      | 23.8       | 24.4           |                | 0.306       |

Sleep duration variability is defined as the within-person standard deviation of sleep duration and is measured in minutes.

\*p<0.05, \*\*p<0.01, \*\*\*p<0.001

Model 1 adjusted for age, sex, race, and field center

Model 2 adjusted for model 1, plus depressive symptoms, anti-depressants, alcohol use, sleep medication, smoking, income, marital status, and education

Model 3 adjusted for model 2, plus sleep duration

**Table S3**—Sleep efficiency and adiposity stratified by sex: the Multi-Ethnic Study of Atherosclerosis

| <b>BMI</b>                 | <85%                 | 85-87.9%               | 87.9-90.4%           | 90.4%-92.4%          | >92.4%<br>(Referent) | P for<br>interaction |
|----------------------------|----------------------|------------------------|----------------------|----------------------|----------------------|----------------------|
| <b>Model 1</b>             |                      |                        |                      |                      |                      | 0.0074               |
| Men                        | 28.7 (28.0, 29.5)    | 28.5 (27.9, 29.1)      | 28.2 (27.6, 28.7)    | 28.5 (28.0, 29.1)    | 28.2 (27.6, 28.7)    |                      |
| Women                      | 30.0 (28.7, 31.3)*   | 30.5 (29.6, 31.5)***   | 29.4 (28.7, 30.0)*   | 28.9 (28.3, 29.6)    | 28.3 (27.7, 28.9)    |                      |
| <b>Model 2</b>             |                      |                        |                      |                      |                      | 0.0050               |
| Men                        | 28.5 (27.7, 29.3)    | 28.6 (27.9, 29.2)      | 28.3 (27.7, 28.9)    | 28.6 (28.0, 29.2)    | 28.3 (27.7, 28.9)    |                      |
| Women                      | 30.0 (28.6, 31.3)*   | 30.6 (29.6, 31.5)***   | 29.6 (28.9, 30.2)*   | 28.8 (28.2, 29.5)    | 28.4 (27.8, 29.1)    |                      |
| <b>Waist Circumference</b> |                      |                        |                      |                      |                      |                      |
| <b>Model 1</b>             |                      |                        |                      |                      |                      | 0.0069               |
| Men                        | 103.1 (101.1, 105.2) | 101.8 (100.1, 103.6)   | 100.6 (99.1, 102.1)  | 102.4 (100.8, 104.0) | 101.0 (99.4, 102.6)  |                      |
| Women                      | 100.0 (96.6, 103.4)* | 101.5 (99.1, 103.9)*** | 98.6 (96.9, 100.3)** | 97.8 (96.1, 99.5)*   | 95.4 (93.7, 97.0)    |                      |
| <b>Model 2</b>             |                      |                        |                      |                      |                      | 0.0058               |
| Men                        | 102.4 (100.2, 104.5) | 102.0 (100.2, 103.9)   | 101.0 (99.4, 102.6)  | 102.4 (100.7, 104.1) | 101.2 (99.5, 102.8)  |                      |
| Women                      | 100.1 (96.5, 103.6)* | 101.6 (99.1, 104.2)*** | 98.8 (97.1, 100.5)*  | 97.7 (95.9, 99.4)    | 95.6 (93.9, 97.4)    |                      |
| <b>Total Body Fat</b>      |                      |                        |                      |                      |                      |                      |
| <b>Model 1</b>             |                      |                        |                      |                      |                      | 0.0490               |
| Men                        | 22.5 (21.0, 24.1)    | 22.0 (20.7, 23.3)      | 21.0 (19.8, 22.1)    | 21.9 (20.7, 23.1)    | 20.8 (19.6, 22.0)    |                      |
| Women                      | 29.3 (26.8, 31.7)    | 30.6 (28.9, 32.3)***   | 29.1 (27.9, 30.3)**  | 28.1 (26.9, 29.3)    | 26.5 (25.4, 27.7)    |                      |
| <b>Model 2</b>             |                      |                        |                      |                      |                      | 0.0467               |
| Men                        | 22.1 (20.4, 23.8)    | 22.0 (20.7, 23.4)      | 21.1 (19.9, 22.4)    | 22.0 (20.7, 23.3)    | 20.9 (19.6, 22.2)    |                      |
| Women                      | 29.2 (26.7, 31.8)    | 30.5 (28.7, 32.3)**    | 29.3 (28.1, 30.6)**  | 27.9 (26.7, 29.1)    | 26.9 (25.7, 28.1)    |                      |

p&lt;0.05, \*\*p&lt;0.01, \*\*\*p&lt;0.001

Model 1 adjusted for age, sex, race, and field center

Model 2 adjusted for model 1, plus depressive symptoms, anti-depressants, alcohol use, sleep medication, smoking, income, marital status, and education

**Table S4**—Sleep efficiency and waist circumference stratified by age: the Multi-Ethnic Study of Atherosclerosis

|                | <85%                   | 85-87.9%                | 87.9-90.4%          | 90.4%-92.4%          | >92.4%<br>(Referent) | P for<br>Interaction |
|----------------|------------------------|-------------------------|---------------------|----------------------|----------------------|----------------------|
| <b>Model 1</b> |                        |                         |                     |                      |                      | 0.0349               |
| Age ≤68        | 102.5 (99.7, 105.3)*** | 102.3 (100.3, 104.4)*** | 99.4 (97.8, 101.0)* | 99.9 (98.2, 101.6)** | 96.6 (94.9, 98.3)    |                      |
| Age > 68       | 100.2 (97.7, 102.7)    | 100.2 (98.0, 102.4)     | 99.9 (98.2, 101.5)  | 99.7 (98.0, 101.3)   | 99.2 (97.6, 100.7)   |                      |
| <b>Model 2</b> |                        |                         |                     |                      |                      | 0.1274               |
| Age ≤68        | 102.2 (99.3, 105.1)**  | 102.5 (100.3, 104.6)*** | 99.7 (98.1, 101.4)* | 99.7 (98.0, 101.4)*  | 96.9 (95.1, 98.7)    |                      |
| Age > 68       | 99.7 (97.1, 102.3)     | 100.4 (98.0, 102.8)     | 99.9 (98.2, 101.6)  | 99.9 (98.2, 101.6)   | 99.3 (97.6, 100.9)   |                      |

\*p&lt;0.05, \*\*p&lt;0.01, \*\*\*p&lt;0.001

Model 1 adjusted for age, sex, race, and field center

Model 2 adjusted for model 1, plus depressive symptoms, anti-depressants, alcohol use, sleep medication, smoking, income, marital status, and education

**Table S5**—Sleep duration and adiposity stratified by sex: the Multi-Ethnic Study of Atherosclerosis

| <b>BMI</b>                 | <5 hours                | 5-6 hours             | 6-7 hours            | 7-8 hours<br>(Referent) | >8 hours            | P for<br>interaction |
|----------------------------|-------------------------|-----------------------|----------------------|-------------------------|---------------------|----------------------|
| <b>Model 1</b>             |                         |                       |                      |                         |                     | 0.0612               |
| Men                        | 29.6 (29.0, 30.3)***    | 28.3 (27.7, 28.9)     | 28.4 (27.9, 28.9)    | 27.6 (27.1, 28.2)       | 27.9 (26.9, 28.8)   |                      |
| Women                      | 30.5 (29.4, 31.6)**     | 30.2 (29.4, 31.0)**   | 28.8 (28.2, 29.4)    | 28.7 (28.1, 29.3)       | 28.5 (27.6, 29.4)   |                      |
| <b>Model 2</b>             |                         |                       |                      |                         |                     | 0.0462               |
| Men                        | 29.6 (28.9, 30.3)***    | 28.5 (27.8, 29.1)     | 28.4 (27.9, 28.9)    | 27.7 (27.1, 28.3)       | 28.0 (27.0, 29.0)   |                      |
| Women                      | 30.7 (29.5, 31.9)**     | 30.4 (29.5, 31.2)**   | 29.0 (28.4, 29.6)    | 28.7 (28.0, 29.3)       | 28.4 (27.5, 29.4)   |                      |
| <b>Waist Circumference</b> | <5 hours                | 5-6 hours             | 6-7 hours            | 7-8 hours<br>(Referent) | >8 hours            | P for<br>interaction |
| <b>Model 1</b>             |                         |                       |                      |                         |                     | 0.0885               |
| Men                        | 105.1 (103.4, 106.9)*** | 101.2 (99.5, 102.9)   | 101.4 (100.1, 102.6) | 99.9 (98.2, 101.5)      | 100.7 (98.2, 103.3) |                      |
| Women                      | 100.1 (97.1, 103.0)*    | 100.8 (98.7, 102.9)** | 97.5 (95.9, 99.1)    | 96.5 (94.9, 98.1)       | 97.0 (94.6, 99.4)   |                      |
| <b>Model 2</b>             |                         |                       |                      |                         |                     | 0.0988               |
| Men                        | 104.8 (102.9, 106.7)*** | 101.5 (99.7, 103.3)   | 101.4 (100.1, 102.8) | 100.0 (98.3, 101.7)     | 101.2 (98.4, 103.9) |                      |
| Women                      | 100.1 (97.1, 103.2)*    | 101.0 (98.8, 103.2)** | 98.0 (96.4, 99.7)    | 96.4 (94.7, 98.0)       | 96.9 (94.4, 99.4)   |                      |

p&lt;0.05, \*\*p&lt;0.01, \*\*\*p&lt;0.001

Model 1 adjusted for age, sex, race, and field center

Model 2 adjusted for model 1, plus depressive symptoms, anti-depressants, alcohol use, sleep medication, smoking, income, marital status, and education

**Table S6—Prevalence of obesity by sleep exposure: the Multi-Ethnic Study of Atherosclerosis**

| <b>Sleep Duration</b>             | <5 hours           | 5-6 hours | 6-7 hours  | 7-8 hours<br>(Referent) | >8 hours             |
|-----------------------------------|--------------------|-----------|------------|-------------------------|----------------------|
| <i>N</i>                          | 288                | 388       | 679        | 559                     | 241                  |
| <b>Overweight</b>                 |                    |           |            |                         |                      |
| Model 1                           | 0.07               | 0.09*     | 0.00       | Ref.                    | -0.04                |
| Model 2                           | 0.07               | 0.09*     | 0.01       | Ref.                    | -0.02                |
| Model 3                           | 0.03               | 0.07      | 0.01       | Ref.                    | -0.04                |
| <b>Obese</b>                      |                    |           |            |                         |                      |
| Model 1                           | 0.16***            | 0.12**    | 0.04       | Ref.                    | -0.02                |
| Model 2                           | 0.16***            | 0.14***   | 0.05       | Ref.                    | 0.00                 |
| Model 3                           | 0.08               | 0.11**    | 0.04       | Ref.                    | 0.00                 |
| <b>Waist circumference</b>        |                    |           |            |                         |                      |
| Model 1                           | 0.10**             | 0.05      | 0.01       | Ref.                    | 0.01                 |
| Model 2                           | 0.09**             | 0.05      | 0.02       | Ref.                    | 0.01                 |
| Model 3                           | 0.05               | 0.04      | 0.02       | Ref.                    | 0.01                 |
| <b>Sleep Efficiency</b>           | <85%               | 85-87.9%  | 87.9-90.4% | 90.4%-92.4%             | >92.4%<br>(Referent) |
| <i>N</i>                          | 208                | 329       | 544        | 523                     | 547                  |
| <b>Overweight</b>                 |                    |           |            |                         |                      |
| Model 1                           | 0.06               | 0.07      | 0.02       | -0.03                   | Ref.                 |
| Model 2                           | 0.06               | 0.04      | 0.03       | -0.04                   | Ref.                 |
| Model 3                           | 0.05               | 0.03      | 0.02       | -0.04                   | Ref.                 |
| <b>Obese</b>                      |                    |           |            |                         |                      |
| Model 1                           | 0.10*              | 0.12**    | 0.09**     | 0.02                    | Ref.                 |
| Model 2                           | 0.09               | 0.10*     | 0.09**     | 0.01                    | Ref.                 |
| Model 3                           | 0.04               | 0.05      | 0.07*      | 0.02                    | Ref.                 |
| <b>Waist Circumference</b>        |                    |           |            |                         |                      |
| Model 1                           | 0.06               | 0.09**    | 0.07*      | 0.02                    | Ref.                 |
| Model 2                           | 0.04               | 0.10**    | 0.07*      | 0.03                    | Ref.                 |
| Model 3                           | 0.01               | 0.07*     | 0.06*      | 0.04                    | Ref.                 |
| <b>Sleep Duration Variability</b> | <=48<br>(Referent) | 48-70     | 70-99      | 99-262                  |                      |
| <i>N</i>                          | 535                | 554       | 523        | 539                     |                      |
| <b>Overweight</b>                 |                    |           |            |                         |                      |
| Model 1                           | Ref.               | 0.04      | 0.00       | 0.01                    |                      |
| Model 2                           | Ref.               | 0.02      | -0.02      | 0.01                    |                      |
| Model 3                           | Ref.               | 0.04      | 0.00       | 0.02                    |                      |
| <b>Obese</b>                      |                    |           |            |                         |                      |
| Model 1                           | Ref.               | -0.01     | 0.04       | 0.05                    |                      |
| Model 2                           | Ref.               | -0.01     | 0.03       | 0.05                    |                      |
| Model 3                           | Ref.               | -0.04     | -0.01      | 0.00                    |                      |
| <b>Waist circumference</b>        |                    |           |            |                         |                      |
| Model 1                           | Ref.               | 0.03      | 0.06       | 0.06*                   |                      |
| Model 2                           | Ref.               | 0.02      | 0.05       | 0.06*                   |                      |
| Model 3                           | Ref.               | 0.02      | 0.04       | 0.04                    |                      |

Reference is normal weight (BMI<25).

\*p<0.05, \*\*p<0.01, \*\*\*p<0.001.

Sleep duration variability is defined as the within-person standard deviation of sleep duration and is measured in minutes.

Model 1 adjusted for age, sex, race, and field center.

Model 2 adjusted for model 1, plus depressive symptoms, anti-depressants, alcohol use, sleep medication, smoking, income, marital status, and education.

Model 3 adjusted for model 2, plus sleep apnea.

| <b>Table S7—Prevalence of obesity by sleep exposure among those with AHI&lt;15: the Multi-Ethnic Study of Atherosclerosis</b> |            |           |            |             |          |  |
|-------------------------------------------------------------------------------------------------------------------------------|------------|-----------|------------|-------------|----------|--|
| <b>Sleep Duration</b>                                                                                                         | <5 hours   | 5-6 hours | 6-7 hours  | 7-8 hours   | >8 hours |  |
| <i>N</i>                                                                                                                      | 135        | 241       | 427        | 354         | 143      |  |
|                                                                                                                               | (Referent) |           |            |             |          |  |
| <b>Overweight</b>                                                                                                             |            |           |            |             |          |  |
| Model 1                                                                                                                       | 0.02       | 0.08      | 0.03       | Ref.        | -0.04    |  |
| Model 2                                                                                                                       | 0.00       | 0.07      | 0.03       | Ref.        | -0.04    |  |
| <b>Obese</b>                                                                                                                  |            |           |            |             |          |  |
| Model 1                                                                                                                       | 0.15*      | 0.14**    | 0.07       | Ref.        | 0.06     |  |
| Model 2                                                                                                                       | 0.15*      | 0.17**    | 0.08*      | Ref.        | 0.09     |  |
| <b>Waist circumference</b>                                                                                                    |            |           |            |             |          |  |
| Model 1                                                                                                                       | 0.06       | 0.07      | 0.03       | Ref.        | 0.08     |  |
| Model 2                                                                                                                       | 0.05       | 0.06      | 0.04       | Ref.        | 0.08     |  |
| <b>Sleep Efficiency</b>                                                                                                       |            |           |            |             |          |  |
| <i>N</i>                                                                                                                      | <85%       | 85-87.9%  | 87.9-90.4% | 90.4%-92.4% | >92.4%   |  |
|                                                                                                                               | 105        | 175       | 321        | 341         | 358      |  |
|                                                                                                                               | (Referent) |           |            |             |          |  |
| <b>Overweight</b>                                                                                                             |            |           |            |             |          |  |
| Model 1                                                                                                                       | 0.05       | 0.07      | 0.09*      | -0.04       | Ref.     |  |
| Model 2                                                                                                                       | 0.06       | 0.07      | 0.08       | -0.05       | Ref.     |  |
| <b>Obese</b>                                                                                                                  |            |           |            |             |          |  |
| Model 1                                                                                                                       | 0.04       | 0.13*     | 0.09*      | 0.00        | Ref.     |  |
| Model 2                                                                                                                       | 0.04       | 0.12*     | 0.09*      | -0.01       | Ref.     |  |
| <b>Waist Circumference</b>                                                                                                    |            |           |            |             |          |  |
| Model 1                                                                                                                       | -0.01      | 0.12**    | 0.08*      | 0.01        | Ref.     |  |
| Model 2                                                                                                                       | -0.04      | 0.13**    | 0.08*      | 0.02        | Ref.     |  |
| <b>Sleep Duration Variability</b>                                                                                             |            |           |            |             |          |  |
| <i>N</i>                                                                                                                      | <=48       | 48-70     | 70-99      | 99-262      |          |  |
|                                                                                                                               | 335        | 348       | 301        | 316         |          |  |
|                                                                                                                               | (Referent) |           |            |             |          |  |
| <b>Overweight</b>                                                                                                             |            |           |            |             |          |  |
| Model 1                                                                                                                       | Ref.       | 0.08      | 0.01       | 0.01        |          |  |
| Model 2                                                                                                                       | Ref.       | 0.06      | 0.00       | 0.02        |          |  |
| <b>Obese</b>                                                                                                                  |            |           |            |             |          |  |
| Model 1                                                                                                                       | Ref.       | -0.01     | 0.00       | 0.02        |          |  |
| Model 2                                                                                                                       | Ref.       | -0.02     | -0.01      | 0.01        |          |  |
| <b>Waist circumference</b>                                                                                                    |            |           |            |             |          |  |
| Model 1                                                                                                                       | Ref.       | 0.05      | 0.06       | 0.08*       |          |  |
| Model 2                                                                                                                       | Ref.       | 0.04      | 0.05       | 0.08*       |          |  |

Sleep duration variability is defined as the within-person standard deviation of sleep duration and is measured in minutes

Reference is normal weight (BMI<25)

\*p<0.05, \*\*p<0.01, \*\*\*p<0.001

Model 1 adjusted for age, sex, race, and field center

Model 2 adjusted for model 1, plus depressive symptoms, anti-depressants, alcohol use, sleep medication, smoking, income, marital status, and education
